# Supplementary material for: Relationship between feeding strategies and nitrogen sources in platform chemical bio-based 2,3-butanediol production in fed-batch fermentation
Source: Royal Society of Chemistry journal article supplement (doi:10.1039/d3re00165b), 2023-01-01
Supplement: d3re00165b1.pdf [file d3re00165b1.pdf]

## Supplementary Material

**Table S1:** Preprogrammed values of the fermentation parameters used in the exponential feed rate calculation.

| Parameters | Units           | Set-point values |
|------------|-----------------|------------------|
| $\mu$      | $\text{h}^{-1}$ | 0.11             |
|            |                 | 0.14             |
|            |                 | 0.17             |
| $Y_{X/S}$  | $\text{g/g}$    | 0.134*           |
| $S_F$      | $\text{g/L}$    | 60.0             |
| $S$        | $\text{g/L}$    | 0.0              |
| $X_0$      | $\text{g/L}$    | 0.983*           |
| $V_0$      | $\text{L}$      | 0.097            |

\*Mean values of the three conditions investigated in batch fermentation

$\mu$ = specific cell growth rate;  $Y_{X/S}$ = dry cell weight/glucose yield;  $S_F$ = glucose feed concentration;  $S$ = residual glucose concentration;  $X_0$ = initial dry cell weight; and  $V_0$ = initial culture volume.

**Table S2:** Glucose exponential feed rate for 2,3-BDO production by *P. peoriae* NRRL BD-62.

| Inoculation time<br>(h) | Feed rate (10 <sup>-3</sup> L/h)*     |       |       |
|-------------------------|---------------------------------------|-------|-------|
|                         | $\mu_{\text{set}}$ (h <sup>-1</sup> ) |       |       |
|                         | 0.11                                  | 0.14  | 0.17  |
| 8                       | 1.30                                  | 1.66  | 2.02  |
| 9                       | 1.46                                  | 1.91  | 2.39  |
| 10                      | 1.63                                  | 2.20  | 2.83  |
| 11                      | 1.81                                  | 2.53  | 3.36  |
| 12                      | 2.03                                  | 2.91  | 3.98  |
| 13                      | 2.26                                  | 3.34  | 4.72  |
| 14                      | 2.52                                  | 3.85  | 5.59  |
| 15                      | 2.82                                  | 4.42  | 6.63  |
| 16                      | 3.15                                  | 5.09  | 7.86  |
| 17                      | 3.51                                  | 5.85  | 9.31  |
| 18                      | 3.92                                  | 6.73  | 11.04 |
| 19                      | 4.37                                  | 7.74  | 13.08 |
| 20                      | 4.88                                  | 8.91  | 15.51 |
| 21                      | 5.45                                  | 10.25 | 18.38 |
| 22                      | 6.09                                  | 11.79 | 21.78 |
| 23                      | 6.79                                  | 13.56 | 25.82 |
| 24                      | 7.58                                  | 15.60 | 30.61 |

$\mu$ = preprogrammed specific cell growth rate.

\*Equations:  $F= 1.30 \exp (0.11t)$  (1);  $F= 1.66 \exp (0.14t)$  (2);  $F= 2.02 \exp (0.17t)$  (3)
